# Supplementary material for: Noble metal-free ternary cobalt–nickel phosphides for enhanced photocatalytic dye-sensitized hydrogen evolution and catalytic mechanism investigation
Source: Royal Society of Chemistry journal article supplement (doi:10.1039/d3ra04235a), 2023-01-01
Supplement: d3ra04235a1.pdf [file d3ra04235a1.pdf]

**Supporting Information for**  
**Noble Metal-free Ternary Cobalt-Nickel Phosphides for**  
**Enhanced Photocatalytic Dye-Sensitized Hydrogen**  
**Evolution and Catalytic Mechanism Investigation**

Zhixing Cheng<sup>†§</sup>, Yiqin Xu<sup>†</sup>, and Bin Fei<sup>\*§</sup>

E-mail: zhixing.cheng@polyu.edu.hk, bin.fei@polyu.edu.hk

<sup>†</sup> Institute of Semiconductors, Guangdong Academy of Sciences, Guangzhou 510070,  
P.R. China

<sup>§</sup> School of Fashion & Textiles, The Hong Kong Polytechnic University, Hong Kong  
100872, P.R. China

## Table of Contents

### 1. Experimental Procedures

### 2. Computational methodology

## Supplementary illustrations and explanations

**Scheme S1.** The preparation process of phosphides: the synthesis of precursors using a mixture of Co and Ni salts and  $\text{NaH}_2\text{PO}_2$  solution, followed by phosphide formation through annealing under an inert atmosphere.

**Figure S1.** Powder XRD pattern of as-prepared  $\text{CoNi}_3\text{P}$ . The mixed phases may contain NiP and  $\text{Ni}_5\text{P}_4$ .

**Figure S2.** The SEM images of the (a) CoP, (b) CoNiP, (c)  $\text{Ni}_2\text{P}$  and (d)  $\text{CoNi}_3\text{P}$  samples.

**Figure S3.** The TEM and HRTEM images of (a, b) the CoP and (c, d) the  $\text{CoNi}_3\text{P}$  samples.

**Figure S4.** The elemental mapping images of (a) CoP, (b)  $\text{Ni}_2\text{P}$  and (c)  $\text{CoNi}_3\text{P}$  samples.

**Figure S5.** The EDX patterns of (a) CoP, (b) CoNiP, (c)  $\text{Ni}_2\text{P}$  and (d)  $\text{CoNi}_3\text{P}$  samples.

**Figure S6.** The High-resolution XPS spectra of (a) Co 2p, (b) Ni 2p, (c) P 2p and (d) O 1s of  $\text{CoNi}_3\text{P}$  sample.

**Figure S7.** (a) The XRD pattern and (b) the SEM pattern of CoNiP sample after cycle stability test.

**Figure S8.** (a) The solid UV-Vis DRS and (b) the PL spectrum of CoP,  $\text{Ni}_2\text{P}$ , CoNiP and  $\text{CoNi}_3\text{P}$  samples.

**Figure S9.** The specific capacitance performances (CV) of CoP, CoNiP,  $\text{CoNi}_3\text{P}$  and  $\text{Ni}_2\text{P}$  samples.

**Table S1.** Comparison of recently reported earth-abundant metal catalysts for photocatalytic Eosin-Y sensitized  $\text{H}_2$  evolution reaction.

# I. Experimental Procedures

## 1. Electrochemical measurements

The electrochemical tests are conducted on an electrochemical workstation (CHI760E, CH instrument) with a conventional three-electrode cell. A Pt plate (1cm × 1cm) is employed as the counter electrode and an Ag/AgCl (saturated KCl) electrode was used as the reference electrode. The working electrode is prepared on a glassy carbon electrode (GCE) with a diameter of 5 mm. The exposed area of the working electrode is 0.19625 cm<sup>2</sup>. The GCE is polished with  $\alpha$ -Al<sub>2</sub>O<sub>3</sub> powder with decreasing sizes (1.0-0.05  $\mu$ m), and it is then ultrasonically washed with deionized water and absolute ethanol before the samples were coated on it.

The electrode materials are prepared by dispersing 5 mg of the catalyst and 1 mL mixed solution, which is compounded by 25  $\mu$ L of Nafion solution, 250  $\mu$ L of ethanol and 750  $\mu$ L of water. The mixture was then sonicated for about 1 h at room temperature to form a homogeneous ink. 10  $\mu$ L of the ink (containing 0.05 mg of catalyst) was loaded onto the GCE, giving a loading mass of 0.25 mg cm<sup>-2</sup>. The same procedure was used for all of the samples during their electrode preparation. The photocurrent measurements were carried out with the electrolyte and 1 M aqueous KOH (pH = 14). The electrochemical impedance spectroscopy (EIS) and cyclic voltammetry measurements are respectively performed in the solution by applying an AC voltage with -1.5 mV amplitude in a frequency range from 1 Hz to 100 kHz. The bias sweep range is from 0 to -0.9 V; the scanning rate of 0.1 V/s. The polarization curve is performed in the same solution with the bias sweep range from -1.4 to -1.8 V vs Ag/AgCl.

## 2. Computational methodology

The first-principles calculations are performed in the framework of the density functional theory with the projector augmented plane-wave method, as implemented in the Vienna ab initio simulation package.<sup>1</sup> The generalized gradient approximation proposed by Perdew, Burke, and Ernzerhof is employed for the exchange-correlation

potential.<sup>2</sup> The long range van der Waals interaction is described by the DFT-D3 approach.<sup>3</sup> The spin-polarized are considered in the calculations. The Ni<sub>2</sub>P (111) surface containing 48 Ni atoms and 24 P atoms, the top two layers of Ni and P atoms are allowed to relax, while the bottom two layers of Ni and P atoms are fixed. The CoNiP (111) surface containing 24 Co atoms, 24 Ni atoms, and 24 P atoms, the top two layers of Co, Ni and P atoms are allowed to relax, while the bottom two layers of Co, Ni and P atoms are fixed. The vacuum layers of 15 Å are added perpendicular to the slabs to avoid artificial interaction between periodic images. The cut-off energy for plane wave is set to 450 eV. The Brillouin zone integration is performed using a 1×1×1 k-mesh for the structural optimization, while a dense k-point mesh of 3×3×1 was used to calculate the density of states. The converged conditions for electronic and ionic optimizations are respectively chosen as 1×10<sup>-5</sup> eV and 0.02 eV/Å.

## II. Supplementary illustrations and explanations

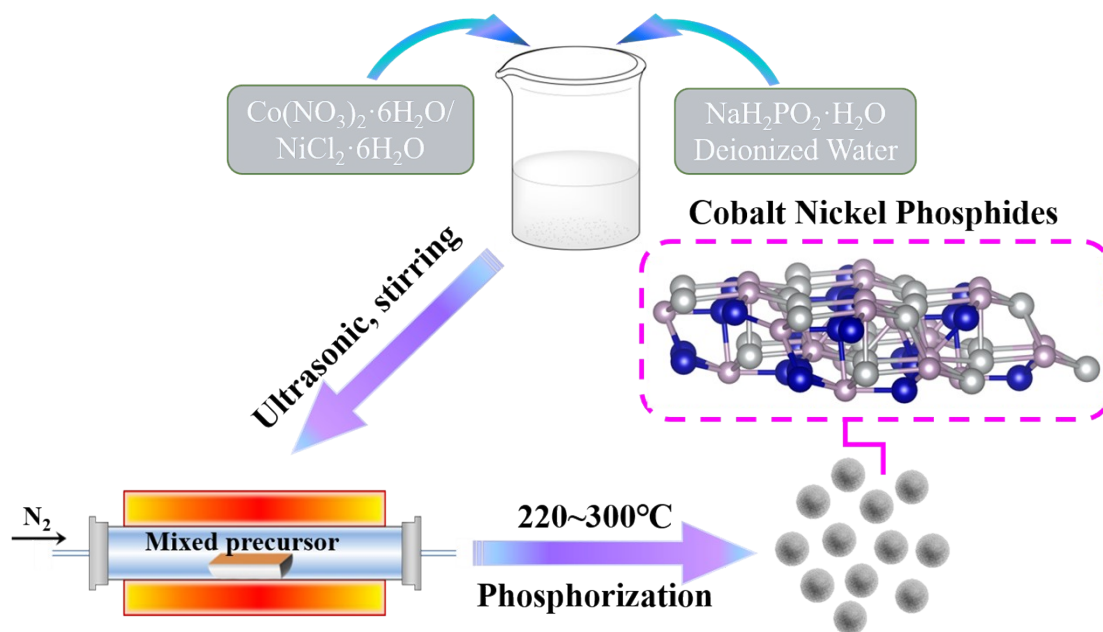

**Scheme S1.** The preparation process of phosphides: the synthesis of precursors using a mixture of Co and Ni salts and  $\text{NaH}_2\text{PO}_2$  solution, followed by phosphide formation through annealing under an inert atmosphere.

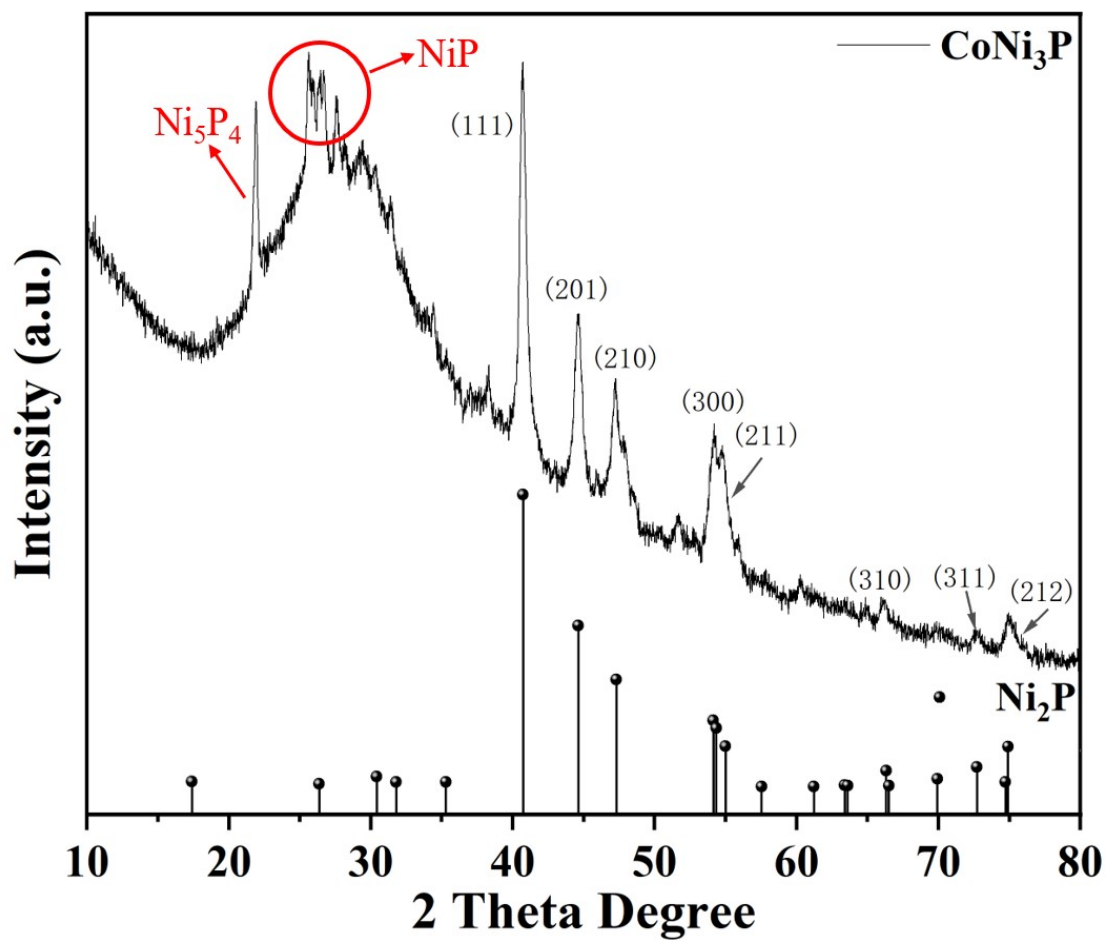

**Figure S1.** Powder XRD pattern of as-prepared  $\text{CoNi}_3\text{P}$ . The mixed phases may contain  $\text{NiP}$  and  $\text{Ni}_5\text{P}_4$ .

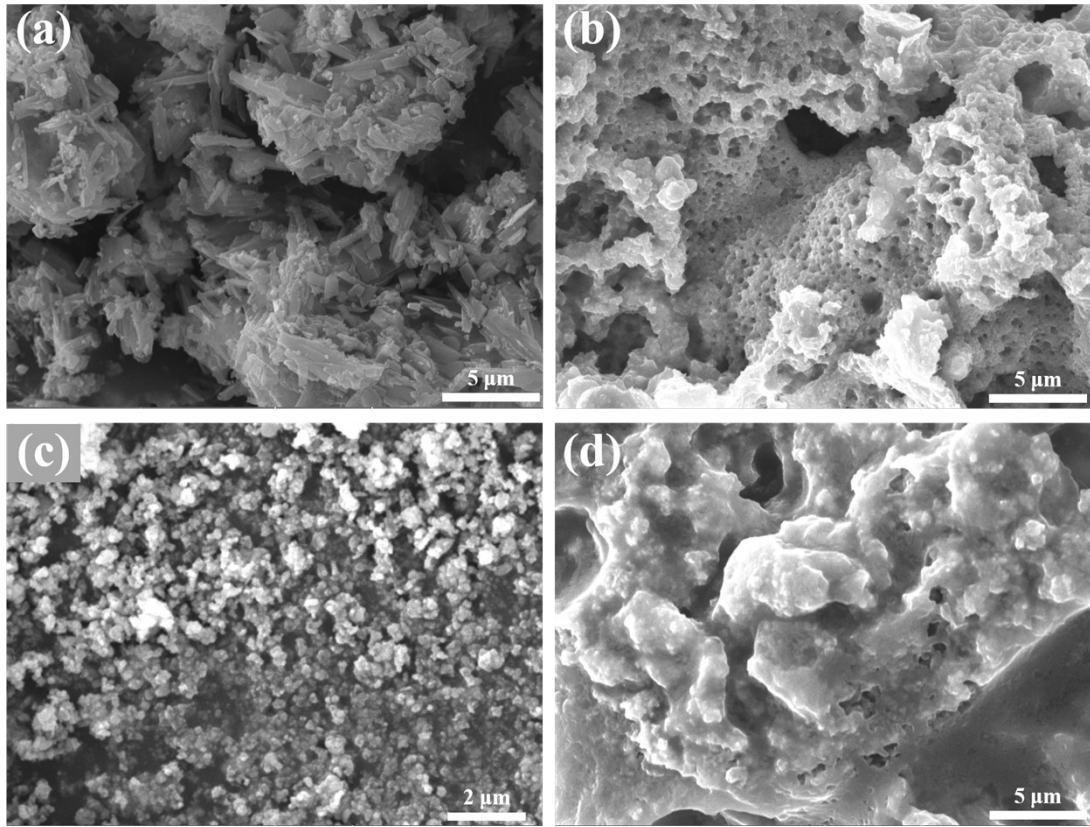

**Figure S2.** The SEM images of the (a) CoP, (b) CoNiP, (c) Ni<sub>2</sub>P and (d) CoNi<sub>3</sub>P samples.

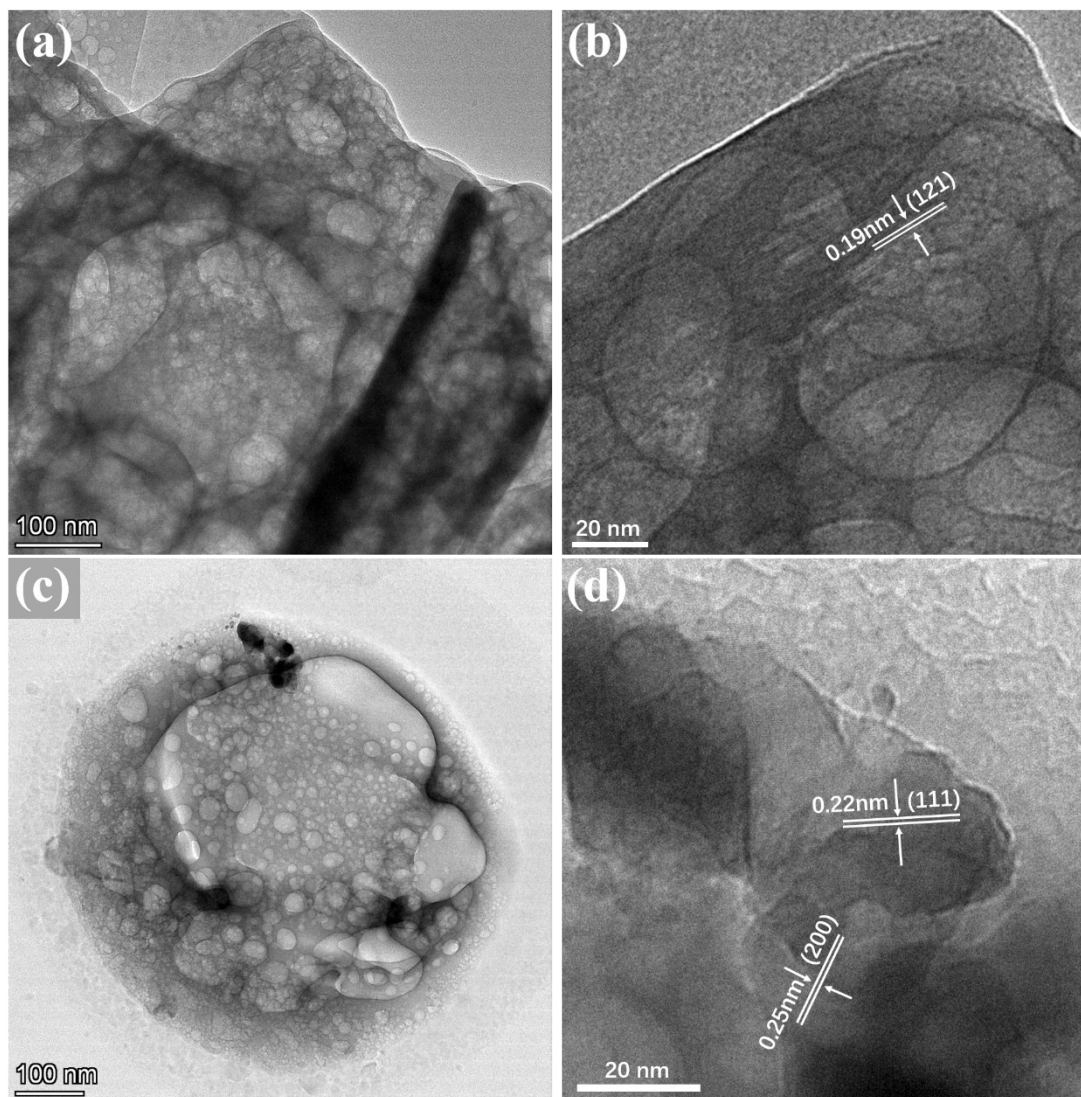

**Figure S3.** The TEM and HRTEM images of **(a, b)** the CoP and **(c, d)** the CoNi<sub>3</sub>P samples.



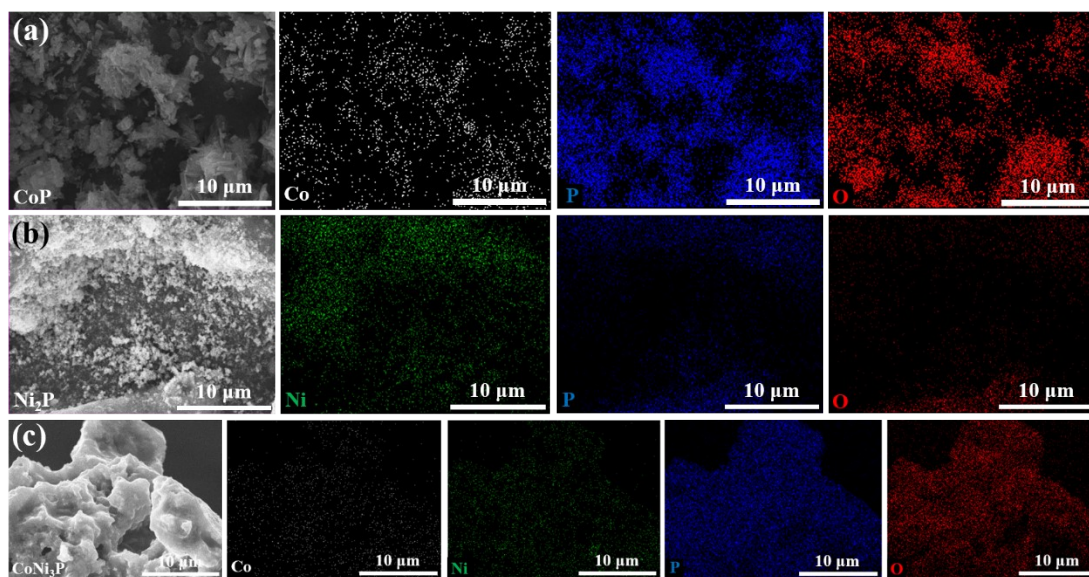

**Figure S4.** The elemental mapping images of (a) CoP, (b) Ni<sub>2</sub>P and (c) CoNi<sub>3</sub>P samples.

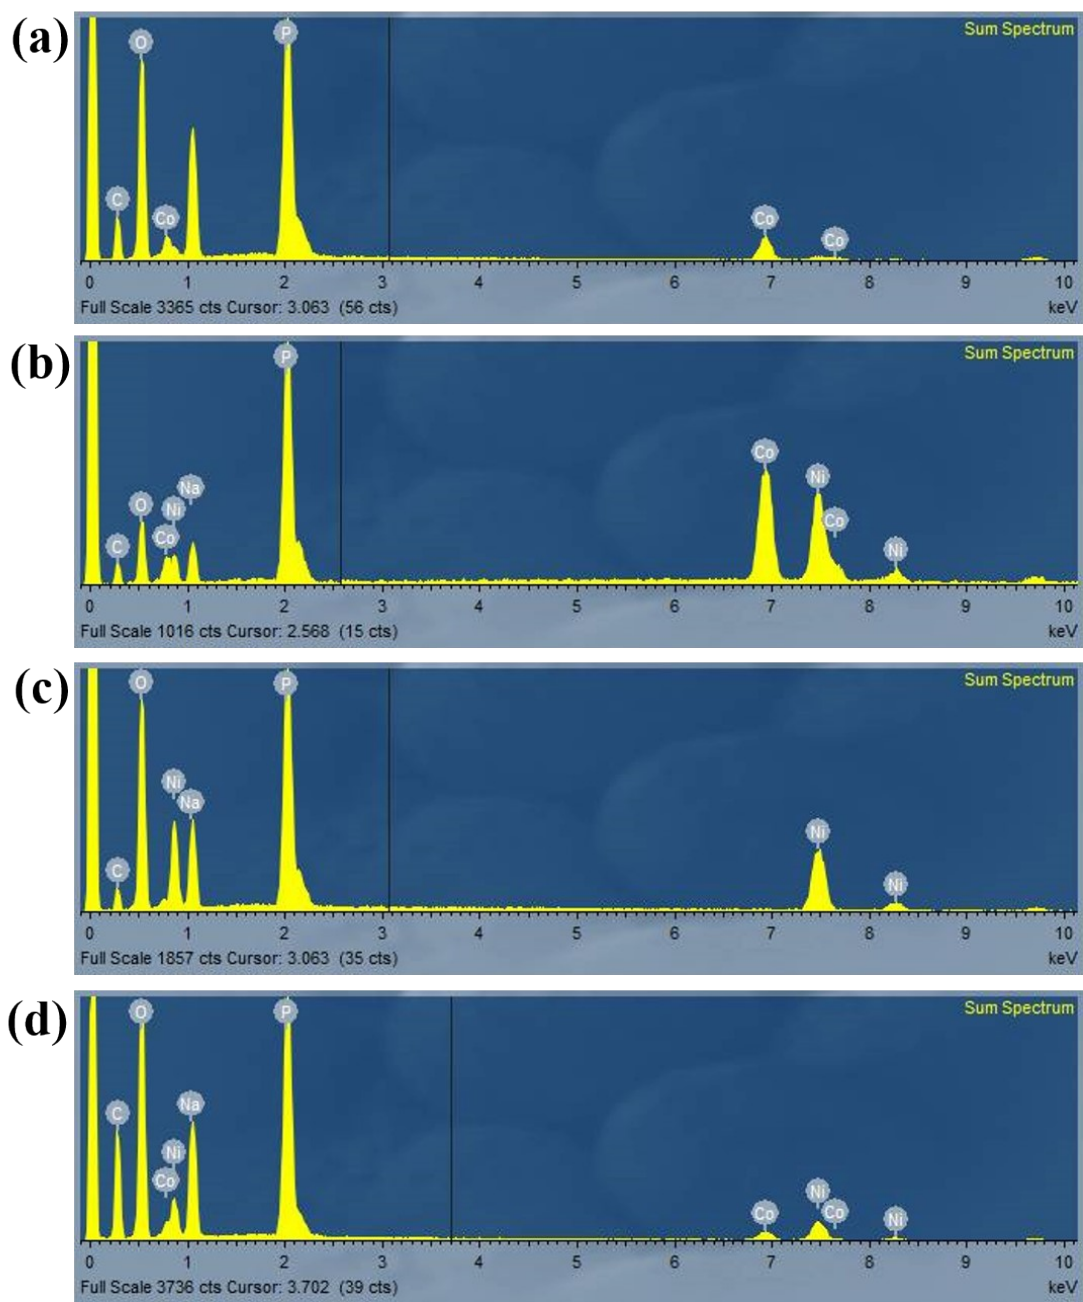

**Figure S5.** The EDX patterns of (a) CoP, (b) CoNiP, (c) Ni<sub>2</sub>P and (d) CoNi<sub>3</sub>P samples.

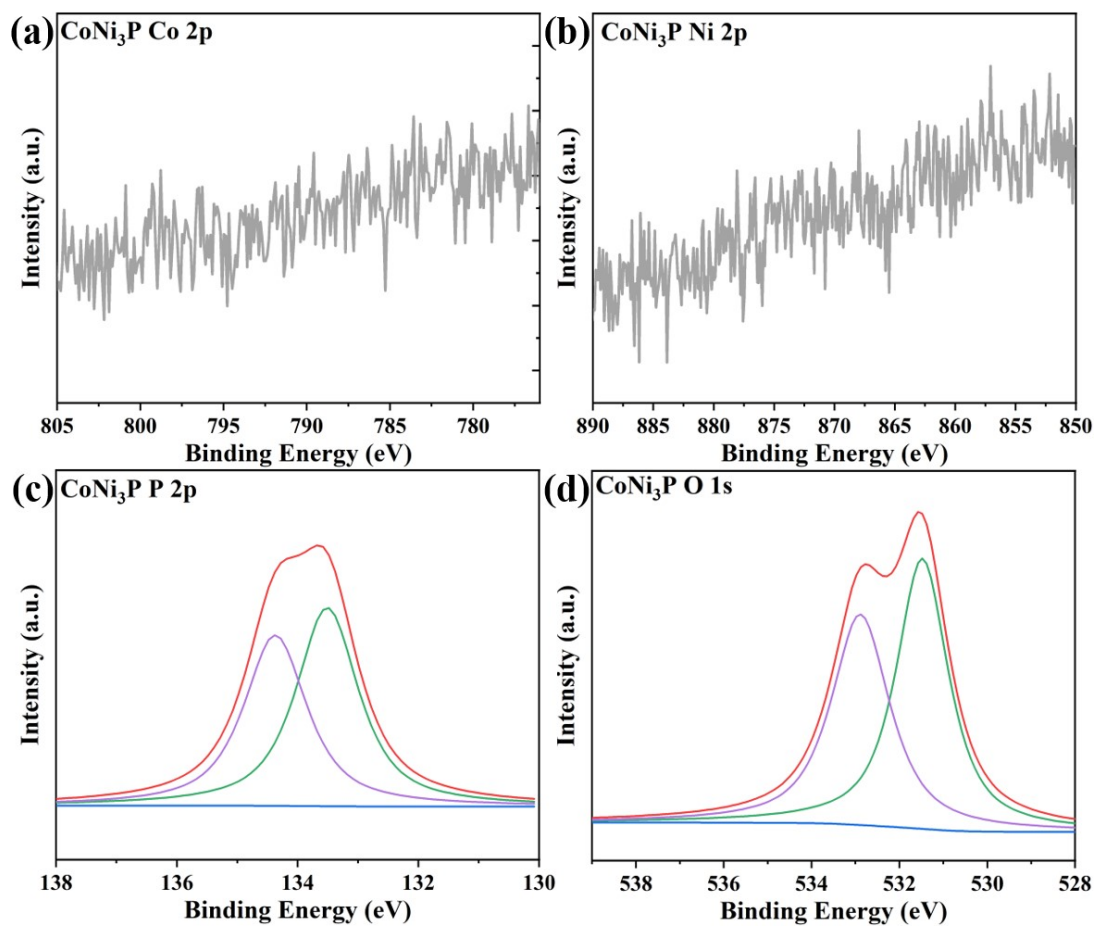

**Figure S6.** The High-resolution XPS spectra of (a) Co 2p, (b) Ni 2p, (c) P 2p and (d) O 1s of CoNi<sub>3</sub>P sample.

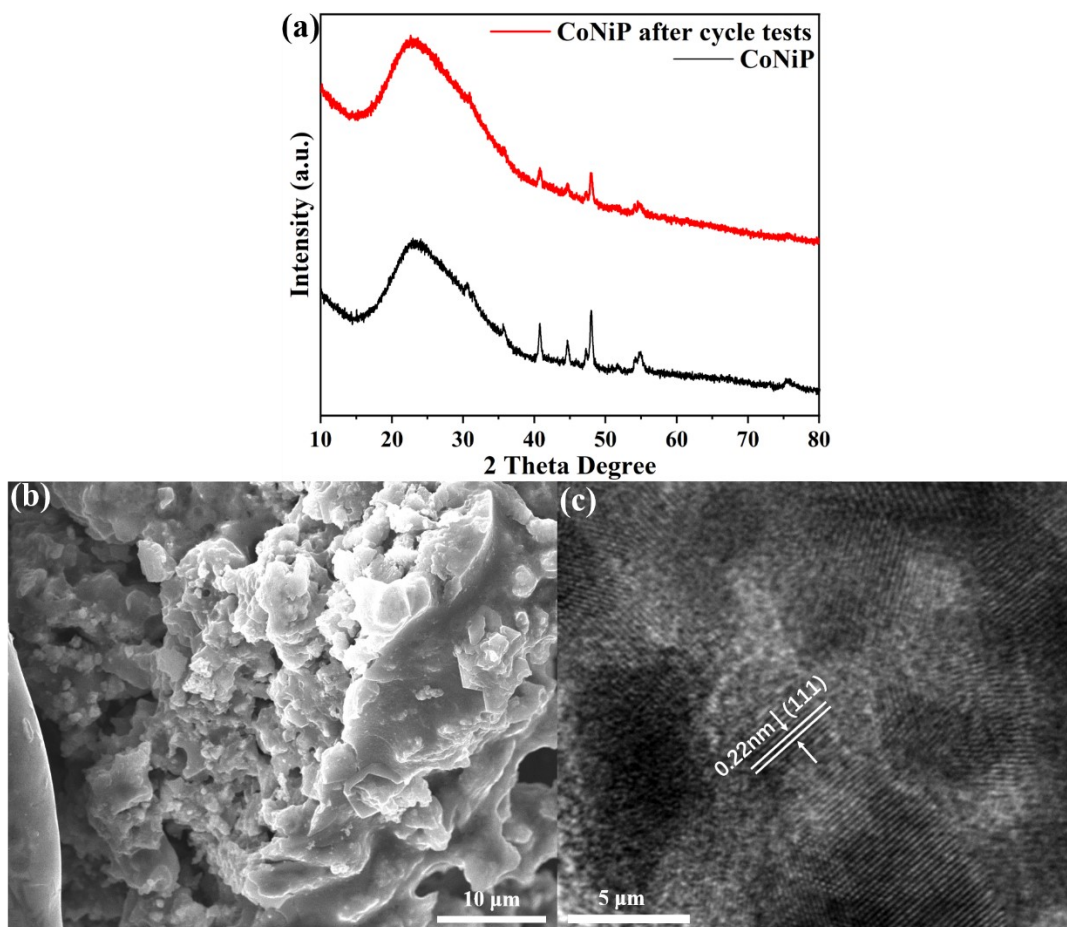

**Figure S7.** (a) The XRD pattern and (b) the SEM pattern of CoNiP sample after cycle stability test.

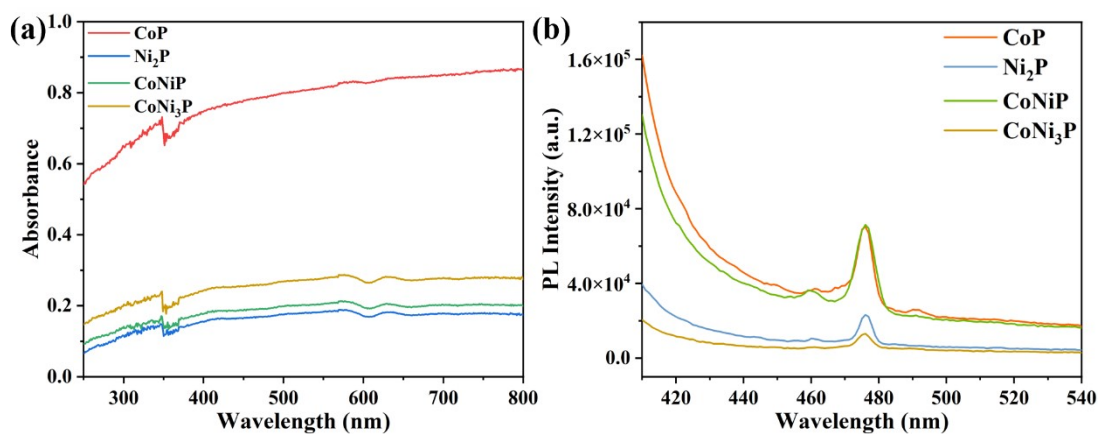

**Figure S8.** (a) The solid UV-Vis DRS and (b) the PL spectrum of CoP, Ni<sub>2</sub>P, CoNiP and CoNi<sub>3</sub>P samples.

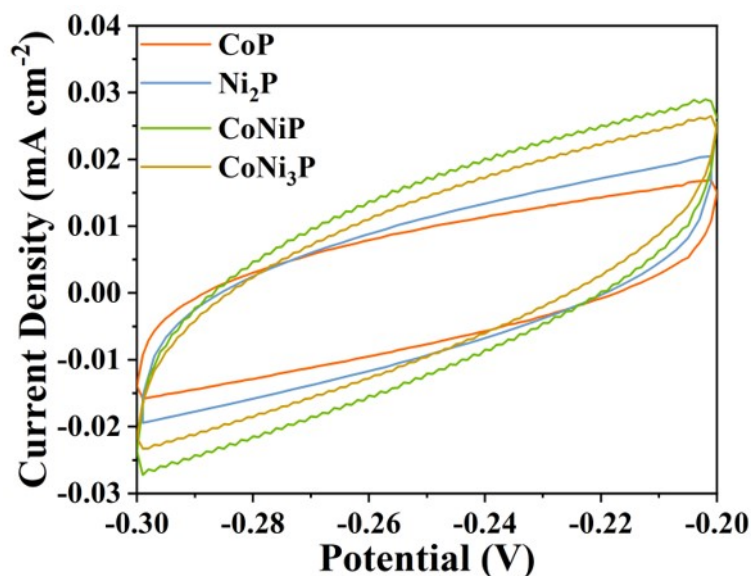

**Figure S9.** The specific capacitance performances (CV) of CoP, CoNiP, CoNi<sub>3</sub>P and Ni<sub>2</sub>P samples.

**Table S1.** Comparison of recently reported earth-abundant metal catalysts for photocatalytic Eosin-Y sensitized H<sub>2</sub> evolution reaction.

| Catalyst                              | H <sub>2</sub> evolution rate<br>(mmol g <sup>-1</sup> h <sup>-1</sup> ) (Cal) | Reactant solution | Ref.            |
|---------------------------------------|--------------------------------------------------------------------------------|-------------------|-----------------|
| CoNiP                                 | 12.96                                                                          | 10% TEOA          | This work       |
| 10%-MCC/M-S                           | 3.9                                                                            | 15% TEOA          | R <sup>4</sup>  |
| Co-NCNT-800                           | 14.7                                                                           | 10% TEOA          | R <sup>5</sup>  |
| CoS                                   | 1.2                                                                            | 5% TEOA           | R <sup>6</sup>  |
| Cu <sub>2-x</sub> Se                  | 1.02                                                                           | 10.6% TEOA        | R <sup>7</sup>  |
| Ni@MOF-5                              | 9.5                                                                            | 10% TEOA          | R <sup>8</sup>  |
| NiB/GO                                | 6.5                                                                            | 10% TEOA          | R <sup>9</sup>  |
| Ni(OH) <sub>2</sub> /TiO <sub>2</sub> | 1.6                                                                            | 5% TEOA           | R <sup>10</sup> |
| Ni <sub>2</sub> P-FG                  | 2.26                                                                           | 10% TEOA          | R <sup>11</sup> |
| Pt/C <sub>3</sub> N <sub>4</sub>      | 0.5                                                                            | 5% TEOA           | R <sup>12</sup> |
| Pt/ZnO                                | 3.9                                                                            | 10% TEOA          | R <sup>13</sup> |

|                                  |      |          |                 |
|----------------------------------|------|----------|-----------------|
| rGO/MOF/Co-Mo-S                  | 6.8  | 15% TEOA | R <sup>14</sup> |
| Sb doped SnO <sub>2</sub>        | 0.25 | 10% TEOA | R <sup>15</sup> |
| Sn-doped ZnO/BiOCl               | 4.15 | 10% TEOA | R <sup>16</sup> |
| W-Co <sub>3</sub> S <sub>4</sub> | 12.5 | 15% TEOA | R <sup>17</sup> |
| UiO-66-NH <sub>2</sub>           | 2.76 | 10% TEOA | R <sup>18</sup> |

## References

- 1 G. Kresse and D. Joubert, *Phys. Rev. B*, 1999, **59**, 1758.
- 2 J. P. Perdew, K. Burke and M. Ernzerhof, *Phys. Rev. Lett.*, 1996, **77**, 3865–3868.
- 3 S. Grimme, J. Antony, S. Ehrlich and H. Krieg, *J. Chem. Phys.*, 2010, **132**, 154104.
- 4 T. Li, T. Yan and Z. Jin, *New J. Chem.*, 2021, **45**, 11905–11917.
- 5 X. Meng, Y. Dong, Q. Hu and Y. Ding, *ACS Sustain. Chem. Eng.*, 2019, **7**, 1753–1759.
- 6 M. Zheng, Y. Ding, L. Yu, X. Du and Y. Zhao, *Adv. Funct. Mater.*, 2017, **27**, 1605846.
- 7 H. Lim, I. Roh, J. Chung, J. Lee, J. W. Song and T. Yu, *J. Ind. Eng. Chem.*, 2023, **123**, 81–87.
- 8 W. Zhen, J. Ma and G. Lu, *Appl. Catal. B Environ.*, 2016, **190**, 12–25.
- 9 M. Q. Yang, J. Dan, S. J. Pennycook, X. Lu, H. Zhu, Q. H. Xu, H. J. Fan and G. W. Ho, *Mater. Horizons*, 2017, **4**, 885–894.
- 10 Z. Yan, X. Yu, Y. Zhang, H. Jia, Z. Sun and P. Du, *Appl. Catal. B Environ.*, 2014, **160–161**, 173–178.
- 11 S. H. Li, N. Zhang, X. Xie, R. Luque and Y. J. Xu, *Angew. Chem. Int. Ed.*, 2018, **57**, 13082–13085.
- 12 Y. Wang, J. Hong, W. Zhang and R. Xu, *Catal. Sci. Technol.*, 2013, **3**, 1703–1711.
- 13 D. Popugaeva, T. Tian and A. K. Ray, *Int. J. Hydrogen Energy*, 2020, **45**, 11097–11107.
- 14 D. Liu, Z. Jin and Y. Bi, *Catal. Sci. Technol.*, 2017, **7**, 4478–4488.
- 15 L. Yang, J. Huang, L. Shi, L. Cao, W. Zhou, K. Chang, X. Meng, G. Liu, Y. Jie and J. J. Ye, *Nano Energy*, 2017, **36**, 331–340.
- 16 Y. Guo, C. Qi, B. Lu and P. Li, *Int. J. Hydrogen Energy*, 2022, **47**, 228–241.
- 17 H. Wang and Z. Jin, *Sustain. Energy Fuels*, 2019, **3**, 173–183.

18 J. Shi, F. Chen, L. Hou, G. Li, Y. Li, X. Guan, H. Liu and L. Guo, *Appl. Catal. B Environ.*, 2021, **280**, 119385.
